# Supplementary material for: Determinants of Vaccine Uptake Against Mpox Among Key Populations in Goma-drc, 2024-2025
Source: Research Square preprint supplement (doi:10.21203/rs.3.rs-8192020/v1), 2025-12-31
Supplement: Supplementary file 1 [file 0c6af4cacbbb833e991fe1b0.pdf]

## **RESEARCH QUESTIONNAIRE**

### **TITLE: DETERMINANTS OF VACCINE UPTAKE AGAINST MPOX AMONG KEY POPULATIONS IN GOMA-DRC, 2024-2025**

#### **SECTION 1: VACCINATION COVERAGE AGAINST MPOX**

1. Were you vaccinated during the first phase of the Mpox vaccination campaign?

☐ Yes

☐ No

#### **SECTION 2: SOCIO-DEMOGRAPHIC INFORMATION**

**2. Age:**

- a. ☐ <18 years
- b. ☐ 18-24 years
- c. ☐ 25-34 years
- d. ☐ 35-44 years
- e. ☐ >45 years

**3. Gender:**

- a. ☐ Male
- b. ☐ Female

**4. Education level:**

- a. ☐ none
- b. ☐ Primary
- c. ☐ Secondary
- d. ☐ University

#### **SECTION 3: ORGANIZATIONAL DETERMINANTS**

**5. What are the main reasons you were not vaccinated against Mpox?**

- a. ☐ Lack of information about the vaccination
- b. ☐ Fear of side effects
- c. ☐ Difficulty accessing the vaccination center
- d. ☐ Personal refusal
- e. ☐ Other

**6. Where were you vaccinated?**

- a. ☐ Community center
- b. ☐ Mobile clinic
- c. ☐ Other

**7. How many kilometers did you travel to reach the vaccination center?**

- a. ☐ < 5 km
- b. ☐ 5–10 km
- c. ☐ >10 km

**8. Did you have to pay to receive the vaccine?**

- a. ☐ Yes
- b. ☐ No

**9. How would you rate your previous vaccination experience?**

- a. ☐ Very satisfactory
- b. ☐ Satisfactory
- c. ☐ Somewhat satisfactory
- d. ☐ Not at all satisfactory

**SECTION 4: SOCIO-CULTURAL DETERMINANTS**

**10. Were you influenced by the peer educator to get vaccinated?**

- a. ☐ Yes
- b. ☐ No

**11. Did you experience any social stigmatization related to your Mpox vaccination?**

- a. ☐ Yes
- b. ☐ No

**12. Do you think Mpox vaccination is important for you and your community?**

- a. ☐ Yes
- b. ☐ No

**13. Marital status**

- a. ☐ Single
- b. ☐ Married
- c. ☐ Divorced

#### 14. Categories

- a. ☐ MSM (Men who have sex with men)
- b. ☐ PS (Sex workers)
- c. ☐ TG (Transgender)
- d. ☐ UDI (People who inject drugs)

### SECTION 4: CULTURAL DETERMINANTS

#### 15. Prior Knowledge of Mpox

| No.                       | Questions                                                  | Response Options                                                                                                                                              | Score   |
|---------------------------|------------------------------------------------------------|---------------------------------------------------------------------------------------------------------------------------------------------------------------|---------|
| 1                         | Have you ever heard of Mpox ?                              | Yes = 1 ; No = 0                                                                                                                                              | 1       |
| 2                         | Do you know the modes of transmission of Mpox?             | Direct contact with an infected person = 1 ;<br>Contact with infected animals = 1 ;<br>Contact with contaminated objects = 1 ;<br>Others (non-scientific) = 0 | Max = 3 |
| 3                         | What are the main signs or symptoms of Mpox that you know? | Fever = 1 ;<br>Rash = 1 ;<br>Muscle aches = 1 ;<br>Swollen lymph nodes = 1 ;<br>Fatigue = 1 ;<br>Others (non-specific) = 0                                    | Max = 5 |
| 4                         | In your opinion, can Mpox be prevented by vaccination?     | Yes = 1 ; No = 0                                                                                                                                              | 1       |
| <b>Total Score (0–10)</b> | <b>Level</b>                                               | <b>Coding</b>                                                                                                                                                 |         |
| 0-4 points                | Low knowledge                                              | 0 = No                                                                                                                                                        |         |
| 5-10 points               | Good knowledge                                             | 1 = Yes                                                                                                                                                       |         |

#### 16. In your opinion, what is the origin of Mpox?

- a. ☐ A divine punishment related to forbidden sexual practices
- b. ☐ An ancestral or family curse
- c. ☐ Community manipulation or witchcraft
- d. ☐ A natural disease without spiritual cause
- e. ☐ A spiritual test of faith

#### 17. What rumors have you heard in your community regarding the Mpox vaccination?

- a. ☐ The vaccine is effective and safe
- b. ☐ The vaccine is a plot against Africa
- c. ☐ The vaccine causes sterility or impotence
- d. ☐ The vaccine is reserved for homosexuals or sex workers
- e. ☐ No rumors heard

**18. Do you think vaccination is important for preventing Mpox?**

- a. ☐ Yes
- b. ☐ No

**19. Were you influenced by someone in your decision regarding Mpox vaccination?**

- a. ☐ Yes
- b. ☐ No

**20. Do you think your social status in the community influenced your decision to get vaccinated?**

- a. ☐ Yes
- b. ☐ No

**21. Do you have a positive perception of Mpox vaccination?**

- a. ☐ Yes
- b. ☐ No

## **SECTION 5: IMPACT OF AWARENESS CAMPAIGNS**

**22. Have you participated in an Mpox awareness session in the last 6 months?**

- a. ☐ Yes
- b. ☐ No

**23. Through which channel did you receive information about Mpox vaccination?**

- a. ☐ Health workers
- b. ☐ Social media
- c. ☐ Community leaders
- d. ☐ Others (please specify)

**24. Did the information you received encourage you to get vaccinated?**

- a. ☐ Yes
- b. ☐ No

**25. Do you think awareness campaigns are sufficient to inform key populations in Goma?**

- a. ☐ Yes
- b. ☐ No

**26. In what context did peer educators sensitize you about Mpox vaccination?**

- a. ☐ Community meetings
- b. ☐ Individual sessions
- c. ☐ Others (please specify)

**27. Do you think peer educators play an essential role in promoting vaccination?**

- a. ☐ Yes
- b. ☐ No
